# Supplementary material for: Linking publication, gene and protein data
Source: Springer Nature journal article supplement (doi:10.1038/ncb1495), 2006-10-23
Supplement: ncb1495-s1.pdf [file ncb1495-s1.pdf]

**Table S1** Some important bioinformatics resources and their applications

| <b>Institutions</b>                                              |                                                                                                          |                                                                                                                   |
|------------------------------------------------------------------|----------------------------------------------------------------------------------------------------------|-------------------------------------------------------------------------------------------------------------------|
| <b>Name</b>                                                      | <b>URL</b>                                                                                               | <b>Description</b>                                                                                                |
| European Bioinformatics Institute (EBI)                          | <a href="http://www.ebi.ac.uk">www.ebi.ac.uk</a>                                                         | European Centre for research and services in bioinformatics, part of EMBL (European Molecular Biology Laboratory) |
| National Center for Biotechnology Information                    | <a href="http://www.ncbi.nih.gov">www.ncbi.nih.gov</a>                                                   | Centre for bioinformatics research and services in the United States, part of the National Institutes of Health.  |
| <b>Primary Databases</b>                                         |                                                                                                          |                                                                                                                   |
| <b>Name</b>                                                      | <b>URL</b>                                                                                               | <b>Description</b>                                                                                                |
| International Nucleotide Sequence Database Collaboration (INSDC) | <a href="http://www.insdc.org">www.insdc.org</a>                                                         | Collaboration that maintains archival repository of nucleotide sequence data                                      |
| EMBL Nucleotide Sequence Database                                | <a href="http://www.ebi.ac.uk/embl">www.ebi.ac.uk/embl</a>                                               | European partner in the INSDC                                                                                     |
| Genbank                                                          | <a href="http://www.ncbi.nih.gov/Genbank">www.ncbi.nih.gov/Genbank</a>                                   | American partner in the INSDC                                                                                     |
| DNA Database of Japan (DDBJ)                                     |                                                                                                          | Japanese partner in the INSDC                                                                                     |
| UniProt Knowledgebase (UniProtKB)                                | <a href="http://www.uniprot.org">www.uniprot.org</a>                                                     | Central access point for protein-related information maintained by the UniProt consortium                         |
| Swiss-Prot                                                       |                                                                                                          | Manually curated portion of the UniProtKB, commonly regarded as a gold standard for functional annotation         |
| Gene                                                             | <a href="http://www.ncbi.nih.gov/query.fcgi?db=gene">www.ncbi.nih.gov/query.fcgi?db=gene</a>             | Database of known genes maintained by NCBI. Provides reference system for NCBI annotation efforts.                |
| RefSeq                                                           | <a href="http://www.ncbi.nih.gov/RefSeq">www.ncbi.nih.gov/RefSeq</a>                                     | Database of reference DNA and protein sequences maintained by NCBI. Closely linked to Gene.                       |
| Ensembl                                                          | <a href="http://www.ensembl.org">www.ensembl.org</a>                                                     | Metazoan genome annotation database                                                                               |
| Saccharomyces Genome Database (SGD)                              | <a href="http://www.yeastgenome.org">www.yeastgenome.org</a>                                             | <i>Saccharomyces</i> genome database                                                                              |
| Mouse Genome Informatics (MGI)                                   | <a href="http://www.informatics.jax.org">www.informatics.jax.org</a>                                     | Mouse genome database                                                                                             |
| FlyBase                                                          | <a href="http://flybase.bio.indiana.edu">flybase.bio.indiana.edu</a>                                     | <i>Drosophila</i> genome database                                                                                 |
| WormBase                                                         | <a href="http://www.wormbase.org">www.wormbase.org</a>                                                   | <i>Caenorhabditis</i> genome database                                                                             |
| GOA                                                              | <a href="http://www.ebi.ac.uk/goa">www.ebi.ac.uk/goa</a>                                                 | Database of functional annotation, part-curated, part derived from InterPro analysis                              |
| IntAct                                                           | <a href="http://www.ebi.ac.uk">www.ebi.ac.uk</a>                                                         | Database of protein interactions                                                                                  |
| BioCyc                                                           | <a href="http://www.biocyc.org">www.biocyc.org</a>                                                       | Collection of pathway and genome databases                                                                        |
| World-wide Protein Data Bank (wwPDB)                             | <a href="http://www.wwpdb.org">www.wwpdb.org</a>                                                         | Repository for protein structure information                                                                      |
| ArrayExpress                                                     | <a href="http://www.ebi.ac.uk/arrayexpress">www.ebi.ac.uk/arrayexpress</a>                               | European repository for microarray data                                                                           |
| Gene Expression Omnibus (GEO)                                    | <a href="http://www.ncbi.nlm.nih.gov/geo">www.ncbi.nlm.nih.gov/geo</a>                                   | American repository for microarray data                                                                           |
| MEDLINE                                                          | <a href="http://www.nlm.nih.gov/pubs/factsheets/jsel.html">www.nlm.nih.gov/pubs/factsheets/jsel.html</a> | Database of information on biomedical literature                                                                  |

|                                           |                                                                                                                            |                                                                                                                                                    |
|-------------------------------------------|----------------------------------------------------------------------------------------------------------------------------|----------------------------------------------------------------------------------------------------------------------------------------------------|
| PubMed                                    | <a href="http://www.ncbi.nih.gov/entrez/query/static/overview.html">www.ncbi.nih.gov/entrez/query/static/overview.html</a> | Expanded version of MEDLINE, searchable through Entrez at NCBI                                                                                     |
| <b>Sequence Analysis</b>                  |                                                                                                                            |                                                                                                                                                    |
| <b>Name</b>                               | <b>URL</b>                                                                                                                 | <b>Description</b>                                                                                                                                 |
| Smith-Waterman (SW)                       | Programs running most sequence analysis algorithms are available from many bioinformatics service providers.               | Dynamic programming algorithm for sequence analysis, widely considered good, but slow. Various hardware-optimised approximations to SW also exist. |
| Basic Local Alignment Search Tool (BLAST) |                                                                                                                            | High speed algorithm for sequence comparison.                                                                                                      |
| FAST-AII (FASTA)                          |                                                                                                                            | Another widely used sequence comparison algorithm                                                                                                  |
| InterProScan                              | <a href="http://www.ebi.ac.uk/InterProScan">www.ebi.ac.uk/InterProScan</a>                                                 | Domain analysis tool incorporating algorithms and annotations from 16 consortium members. Results for known sequences stored in InterPro database. |
| TMHMM                                     | <a href="http://www.cbs.dtu.dk/services/TMHMM-2.0">www.cbs.dtu.dk/services/TMHMM-2.0</a>                                   | Prediction of transmembrane helices in proteins                                                                                                    |
| SWISS-MODEL                               | <a href="http://swissmodel.expasy.org">swissmodel.expasy.org</a>                                                           | Automated protein modelling server                                                                                                                 |
| PSIPRED                                   | <a href="http://bioinf.cs.ucl.ac.uk/psipred">bioinf.cs.ucl.ac.uk/psipred</a>                                               | Protein structure prediction server, offers access to the GenTHREADER program                                                                      |
| <b>Warehouses and web portals</b>         |                                                                                                                            |                                                                                                                                                    |
| EBI SRS server                            | <a href="http://srs.ebi.ac.uk">srs.ebi.ac.uk</a>                                                                           | Primary data warehouse/query engine maintained by EBI                                                                                              |
| NCBI Entrez server                        | <a href="http://www.ncbi.nih.gov/database/index.html">www.ncbi.nih.gov/database/index.html</a>                             | Primary data warehouse/query engine maintained by NCBI                                                                                             |
| Integr8                                   | <a href="http://www.ebi.ac.uk/integr8">www.ebi.ac.uk/integr8</a>                                                           | Provides structured overview of genes and genomes                                                                                                  |
| iHOP                                      | <a href="http://www.ihop-net.org/UniPub/iHOP">www.ihop-net.org/UniPub/iHOP</a>                                             | Portal for assessing automatically retrieved literature linked to genes and proteins                                                               |
| <b>Generic database schemas</b>           |                                                                                                                            |                                                                                                                                                    |
| GMOD                                      | <a href="http://www.gmod.org">www.gmod.org</a>                                                                             | Schema maintained by several model organism databases                                                                                              |
| GUS                                       | <a href="http://www.gusdb.org">www.gusdb.org</a>                                                                           | Schema for functional genomics data                                                                                                                |
| <b>Integration tools</b>                  |                                                                                                                            |                                                                                                                                                    |
| BioMart                                   | <a href="http://www.biomart.org">www.biomart.org</a>                                                                       | Data warehousing system designed for easy local install, interface generation and distributed querying                                             |
| Taverna                                   | <a href="http://taverna.sourceforge.net">taverna.sourceforge.net</a>                                                       | Workflow manager for bioinformatics. Part of the MyGRID project.                                                                                   |
| MyGRID                                    | <a href="http://mygrid.org.uk">mygrid.org.uk</a>                                                                           | Project developing a suite of tools for distributed computing in bioinformatics                                                                    |
